# Supplementary material
Source: PubMed Central journal article supplement (PMC2896463)
Supplement: 09_187_Cho_Suppl.pdf [file 09_187_Cho_Suppl.pdf]

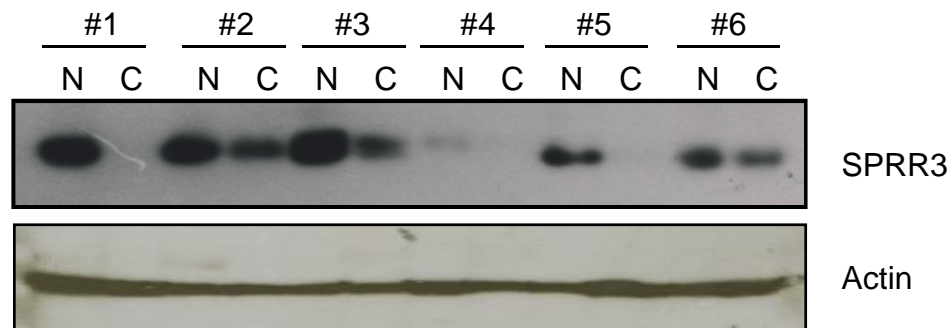

**Suppl. Figure 1. SPRR3 is down-regulated in esophageal cancer.** Expression of SPRR3 was assessed by Western blotting with SPRR3 antibody in esophageal tumor tissues (T: tumor tissue, N: corresponding normal tissue). Actin was used as a loading control.

Suppl. Figure 1. Cho et al.
